# Supplementary material for: Centriole maturation requires regulated Plk1 activity during two consecutive cell cycles
Source: PubMed Central journal article supplement — J Cell Biol. 2014 Sep 29;206(7):855–65. doi: 10.1083/jcb.201407087 (PMC4178969; doi:10.1083/jcb.201407087), 2014-09-29
Supplement: supp_jcb.201407087_JCB_201407087_sm.pdf [file supp_jcb.201407087_JCB_201407087_sm.pdf]

Kong et al., <http://www.jcb.org/cgi/content/full/jcb.201407087/DC1>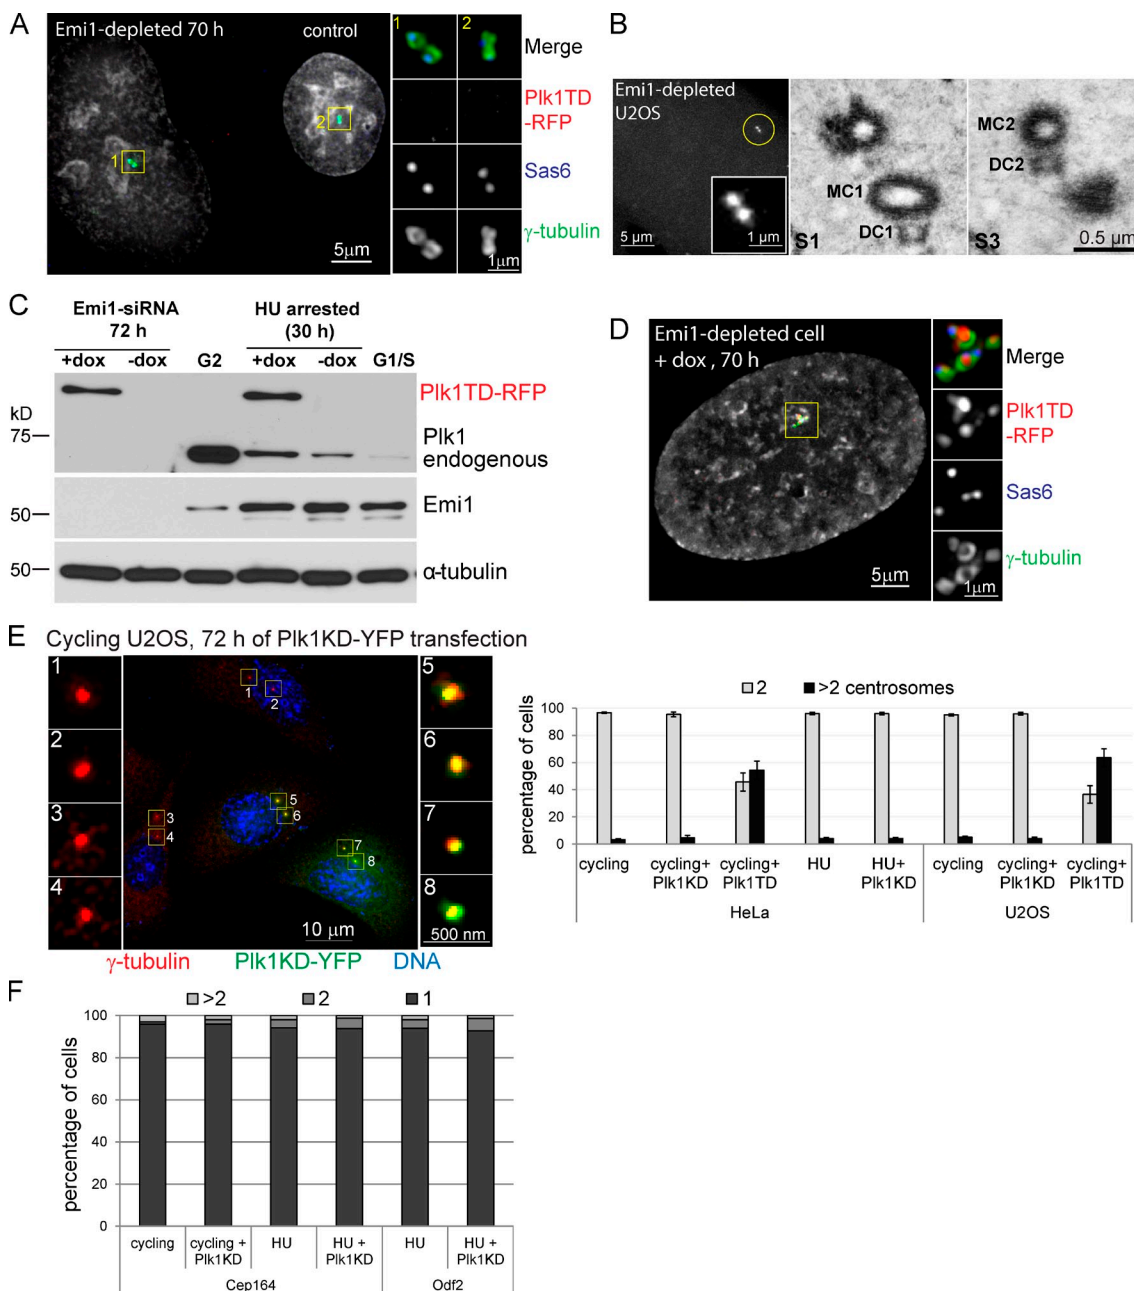

**Figure S1. Expression of active Plk1 promotes centriole reduplication in endocycling Emi1-d cells.** (A) Emi1-d cells have two  $\gamma$ -tubulin signals, each associated with one Sas6 signal, indicative of two duplicated centrosomes. Plk1TD-RFP is not induced. (B) CLEM analysis of centrioles in Emi1-d cells. Two C1-GFP signals are visible by fluorescent microscopy. EM analysis of the same centrioles reveals two MCs each associated with a  $\sim$ 100-nm-long DC. An enlarged C1-GFP signal (encircled in yellow) is shown in the inset. (C) Endogenous Plk1 is undetectable in Emi1-d cells by Western blotting. The cells express physiological levels of T210D-RFP upon induction by doxycycline (dox). (D) Induction of Plk1TD-RFP in Emi1-d cells induces disengagement and subsequent centriole reduplication, judging by the increased number of  $\gamma$ -tubulin and Sas6 signals. (E and F) Expression of kinase-dead mutant of Plk1 (Plk1KD) in cycling or HU-arrested cells does not promote centriole disengagement, reduplication, or accumulation of appendage proteins on the centrosomes. Plk1KD was transfected into cycling or HU-arrested cells. Cycling cells were fixed for 72 h, HU-arrested 36 h later, and labeled for  $\gamma$ -tubulin, Cep164, or Odf2. (E) Quantification of  $\gamma$ -tubulin signals ( $n = 300$  for each condition for three experiments). The error bars represent the means and SD. (F) Quantification of Cep164 or Odf2 signals ( $n = 100$ ). Associated with Fig. 1 and Fig. 3.



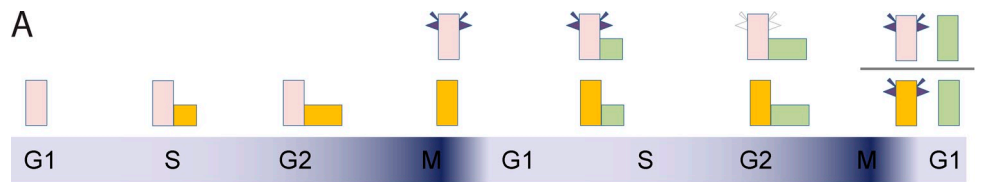

Unperturbed two consecutive cell cycles with controlled, timely regulated Plk1 activity. Plk1 activity is low during G1 and S and peaks during G2 and the first part of M. Nascent centrioles gradually mature through two cell cycles.

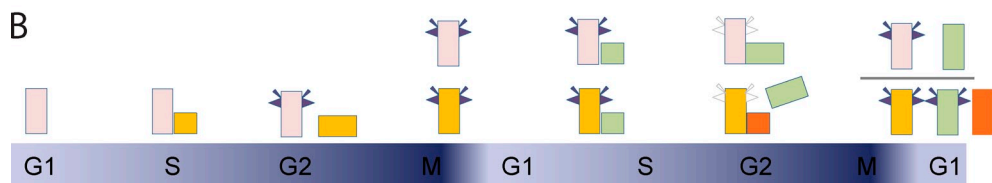

Cells expressing near physiological level of active Plk1 mutant. Plk1 activity is low during G1 due to Plk1 degradation but is present on the centrosomes from early S to M. The centriole maturation process accelerates.

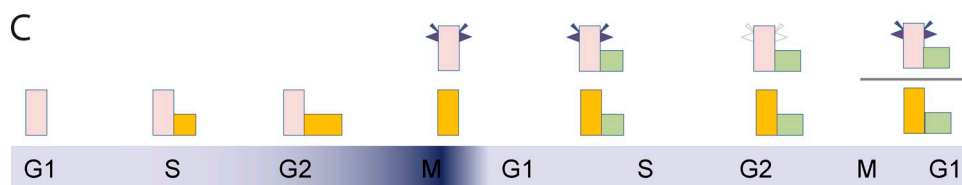

If Plk1 activity is inhibited in centriole's second cell cycle, centriole maturation is not complete and appendage assembly on young mother centrioles is compromised. Nascent centrioles cannot reach full length.

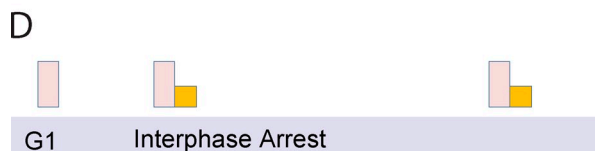

Hydroxyurea treatment or Emi1-depletion. In cells arrested in interphase with low/ without Plk1 activity, maturation of young centrioles does not occur.

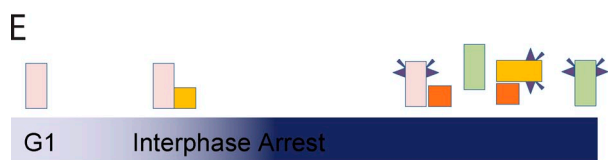

Hydroxyurea treatment or Emi1-depletion with induction of active Plk1. Cells arrested in interphase with high Plk1 activity. Centriole maturation and reduplication occurs within one cell cycle in the absence of mitotic progression.

low high  
Plk1 activity

Immature centriole without appendages

Mature centriole with appendages

Mature centriole with diminished level of Cep164 and Odf2

Figure S3. **Controlled Plk1 activity through two consecutive cell cycles is necessary for timely centriole maturation.** Scheme summarizes how dysregulation of Plk1 activity influences centriole cycle.

Table S1. Immunofluorescence analysis of the centrosomes in Emi1-d cells before and after Plk1TD-RFP expression

| Protein      | Emi1-d cells   |    |                |     |                |     |     | Comment                                                                                        |
|--------------|----------------|----|----------------|-----|----------------|-----|-----|------------------------------------------------------------------------------------------------|
|              | No Plk1TD      |    | Plk1TD 46 h    |     | Plk1TD 70 h    |     |     |                                                                                                |
|              | MC             | DC | MC             | DC1 | MC             | DC1 | DC2 |                                                                                                |
| Plk1TD-RFP   | –              | –  | +              | +   | +              | +   | +   | Associates with DCs during disengagement and onward, and intensity on DCs increases with time  |
| hSas6        | –              | +  | –              | ±   | –              | –   | ±   | Gradually disappears from DCs after disengagement; associated with all nascent centrioles      |
| Centrobin    | ±              | +  | ±              | +   | ±              | ±   | +   | Gradually disappears from DCs after disengagement; associated with all nascent centrioles      |
| Cep152       | +              | –  | +              | –   | +              | +   | –   | Full or partial rings gradually form around DCs after their disengagement; please see Fig. 1.  |
| CPAP         | +              | +  | +              | +   | +              | +   | +   | Associates with DCs during disengagement and onward                                            |
| Cep135       | +              | ±  | +              | +   | +              | +   | +   | Associates with DCs during disengagement and onward                                            |
| Cep120       | +              | +  | +              | +   | +              | +   | +   | Associates with DCs during disengagement and onward                                            |
| γ-Tubulin    | +              | –  | +              | +   | +              | +   | +   | Associates with DCs during disengagement and onward, and intensity on DCs increases with time. |
| Cep170       | + <sup>a</sup> | –  | + <sup>b</sup> | +   | + <sup>b</sup> | ±   | ±   | Accumulates early after disengagement on most DCs                                              |
| Cep164       | + <sup>a</sup> | –  | + <sup>b</sup> | ±   | + <sup>b</sup> | ±   | ±   | Accumulates on some DCs after disengagement; please see Fig. 1.                                |
| Odf2         | + <sup>a</sup> | –  | + <sup>b</sup> | –   | + <sup>b</sup> | ±   | ±   | Accumulates on some DCs after disengagement; please see Fig. 1.                                |
| Centrin1-GFP | +              | +  | +              | +   | +              | +   | +   | Associates with all centrioles from their formation                                            |
| hPOC5        | +              | –  | +              | +   | +              | +   | +   | Associates with DCs during disengagement and onward                                            |
| GT335        | +              | –  | +              | +   | +              | +   | +   | Associates with DCs during disengagement and onward                                            |

Plk1TD, constitutively active Plk1 T210D mutant; MC, original mother centriole; DC, engaged daughter centriole; DC1, first generation of disengaged DCs; DC2, second and subsequent generations of disengaged DCs; CPAP, centrosomal P4.1-associated protein; +, associated with a centriole; –, undetectable; ±, sometimes associated with the centriole. Associated with Fig. 1.

<sup>a</sup>Associated with only one MC.

<sup>b</sup>Associated with both MCs.

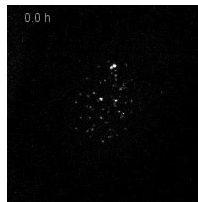

Video 1. **Localization and dynamics of Plk1TD-RFP in cycling U2OS cells.** Expression of Plk1TD-RFP was induced in U2OS cells by dox. 20 h later, cells growing on the coverslip were assembled into the Rose chamber and imaged by an inverted microscope (Eclipse Ti; Nikon) equipped with spinning-disk confocal microscope (Yokogawa Electric Corporation), a back-illuminated 16-μm-pixel electron-multiplying charge-coupled device camera (DU897; Andor Technology), and a 60x, NA 1.45 Plan Apochromat TIRF objective. 200-nm z sections spanning the entire volume of interphase cells were taken every 5 min. Maximal intensity projections are shown. The almost physiological level Plk1TD-RFP in a U2OS cell is undergoing a typical cell cycle-dependent regulation and relocalization to different cellular structures, such as kinetochores, centrosomes, and the midbody.

**An Excel file is also included that shows a distance calculator for multichannel 3D images used in this study.**
